# Supplementary material for: Three novel metal–organic frameworks with different coordination modes for trace detection of anthrax biomarkers
Source: Royal Society of Chemistry journal article supplement (doi:10.1039/d1dt03760a), 2021-11-25
Supplement: d1dt03760a1.pdf [file d1dt03760a1.pdf]

## Three novel metal-organic frameworks with different coordination modes for trace detection of anthrax biomarkers

Zhenzhong Cong,<sup>[a]</sup> Mingchang Zhu,<sup>[b]</sup> Ying Zhang,<sup>[b]</sup> Wei Yao,<sup>[a]</sup> Marina Kosinova,<sup>[c]</sup> Vladimir P. Fedin,<sup>[c]</sup> Shuangyan Wu<sup>\*[b]</sup> and Enjun Gao<sup>\*[a,b]</sup>

Table S1 Crystallographic data of **MOF 1**

| parameter                                    | {[Ca <sub>3</sub> (ddpa)·7H <sub>2</sub> O]} <sub>n</sub>       |
|----------------------------------------------|-----------------------------------------------------------------|
| Formula                                      | C <sub>24</sub> H <sub>22</sub> Ca <sub>3</sub> O <sub>22</sub> |
| Formula weight                               | 782.65 g/mol                                                    |
| Crystal system                               | <i>Monoclinic</i>                                               |
| Space group                                  | P2 <sub>1</sub> /c                                              |
| <i>a</i> / Å                                 | 7.9374(2)                                                       |
| <i>b</i> / Å                                 | 22.5281(5)                                                      |
| <i>c</i> / Å                                 | 19.6837(5)                                                      |
| $\alpha$ / °                                 | 90                                                              |
| $\beta$ / °                                  | 92.9800(10)                                                     |
| $\gamma$ / °                                 | 90                                                              |
| V (Å <sup>3</sup> )                          | 3514.97(15)                                                     |
| Z                                            | 4                                                               |
| $\rho_{\text{calc}}/\text{cm}^3$             | 1.479                                                           |
| The Range for data Collection                | 4.144 to 52.742                                                 |
| Data / restraints / parameters               | 2736 / 7 / 210                                                  |
| Independent reflections                      | 7169 [ $R_{\text{int}}=0.0493, R_{\text{sigma}}=0.0282$ ]       |
| Completeness / %                             | 99.9%                                                           |
| GOF on $F^2$                                 | 1.082                                                           |
| Final R indices ( $I > 2\sigma(I)$ )         | $R_1=0.0548, wR_2=0.1643$                                       |
| R indices (all data)                         | $R_1=0.0662, wR_2=0.1751$                                       |
| Largest diff. peak / hole / eÅ <sup>-3</sup> | 1.91 / -0.70                                                    |

$${}^a R_1 = \sum ||F_o| - |F_c|| / \sum |F_o|. \quad {}^b wR_2 = [\sum w(F_o^2 - F_c^2)^2 / \sum w(F_o^2)^2]^{1/2}$$

Table S2 Selected bond lengths (Å) and angles (°) for the **MOF 1**

| Bond                                  | Length/Å        | Bond                                  | Length/Å        |
|---------------------------------------|-----------------|---------------------------------------|-----------------|
| Ca1-O11 <sup>1</sup>                  | 2.416(2)        | Ca1-O8 <sup>3</sup>                   | 2.441(2)        |
| Ca1-O13                               | 2.484(2)        | Ca1-O2 <sup>4</sup>                   | 2.382(4)        |
| Ca1-O7 <sup>3</sup>                   | 2.403(2)        | Ca1-O3 <sup>5</sup>                   | 2.457(2)        |
| Ca1-O15                               | 2.562(2)        | Ca1 O14                               | 2.664(2)        |
| Ca2-O8 <sup>6</sup>                   | 2.504(2)        | Ca2-O13 <sup>7</sup>                  | 2.353(2)        |
| Ca2-O20                               | 2.424(3)        | Ca2-O21                               | 2.328(2)        |
| Ca2-O9 <sup>6</sup>                   | 2.462(2)        | Ca2-O6                                | 2.340(3)        |
| Ca2-C14 <sup>6</sup>                  | 2.828(3)        | Ca2-O22                               | 2.417(7)        |
| Ca3-O11 <sup>2</sup>                  | 2.725(2)        | Ca3-O15                               | 2.402(2)        |
| Ca3-O14                               | 2.447(2)        | Ca3-O12 <sup>2</sup>                  | 2.468(3)        |
| Ca3-O19                               | 2.392(3)        | Ca3-O18                               | 2.370(3)        |
| Ca3-O16                               | 2.496(4)        | Ca3-O17                               | 2.443(5)        |
| Angle                                 | $\omega/^\circ$ | Angle                                 | $\omega/^\circ$ |
| O7 <sup>3</sup> -Ca1-O14              | 136.50(8)       | O18-Ca3-O11 <sup>1</sup>              | 76.77(10)       |
| O11 <sup>1</sup> -Ca1-O8 <sup>3</sup> | 74.76(8)        | O18-Ca3-O15                           | 138.13(11)      |
| O11 <sup>1</sup> -Ca1-O13             | 95.96(8)        | O18-Ca3-O14                           | 78.68(12)       |
| O11 <sup>1</sup> -Ca1-O3 <sup>4</sup> | 137.10(8)       | O18-Ca3-O12 <sup>1</sup>              | 84.50(12)       |
| O11 <sup>1</sup> -Ca1-O15             | 68.09(8)        | O18-Ca3-O19                           | 120.69(12)      |
| O11 <sup>1</sup> -Ca1-O14             | 73.73(7)        | O18-Ca3-O16                           | 135.18(17)      |
| C10-C11-C13                           | 118.8(3)        | O18-Ca3-O17                           | 73.33(15)       |
| O8 <sup>3</sup> -Ca1-O13              | 71.83(7)        | O16-Ca3-O11 <sup>1</sup>              | 111.98(11)      |
| O8 <sup>3</sup> -Ca1-O3 <sup>4</sup>  | 140.50(8)       | O17-Ca3-O11 <sup>1</sup>              | 139.05(12)      |
| O8 <sup>3</sup> -Ca1-O15              | 142.31(8)       | O17-Ca3-O14                           | 126.77(14)      |
| O8 <sup>3</sup> -Ca1-O14              | 108.68(8)       | O17-Ca3-O12 <sup>1</sup>              | 99.42(13)       |
| O3 <sup>4</sup> -Ca1-O14              | 71.41(8)        | O17-Ca3-O16                           | 73.46(17)       |
| O13-Ca1-O15                           | 117.39(8)       | O14-Ca3-O12 <sup>1</sup>              | 122.01(8)       |
| O13-Ca1-O14                           | 50.52(7)        | O21-Ca2-O8 <sup>6</sup>               | 152.51(9)       |
| O3 <sup>4</sup> -Ca1-O13              | 80.57(8)        | O21-Ca2-O13 <sup>7</sup>              | 87.26(9)        |
| O2 <sup>5</sup> -Ca1-O11 <sup>1</sup> | 91.88(8)        | O21-Ca2-O20                           | 83.49(9)        |
| O2 <sup>5</sup> -Ca1-O8 <sup>3</sup>  | 100.12(8)       | O21-Ca2-O9 <sup>6</sup>               | 152.15(9)       |
| O2 <sup>5</sup> -Ca1-O13              | 166.74(8)       | O21-Ca2-O6                            | 96.26(10)       |
| O2 <sup>5</sup> -Ca1-O7 <sup>3</sup>  | 74.83(8)        | O9 <sup>6</sup> -Ca2-O8 <sup>6</sup>  | 52.92(7)        |
| O2 <sup>5</sup> -Ca1-O3 <sup>4</sup>  | 100.84(8)       | O21-Ca2-O22                           | 76.75(19)       |
| O2 <sup>5</sup> -Ca1-O15              | 75.50(8)        | O15-Ca3-O14                           | 73.08(8)        |
| O2 <sup>5</sup> -Ca1-O14              | 142.53(8)       | O15-Ca3-O12 <sup>1</sup>              | 84.96(9)        |
| O3 <sup>4</sup> -Ca1-O15              | 75.74(8)        | O13 <sup>7</sup> -Ca2-O8 <sup>6</sup> | 72.94(8)        |
| O7 <sup>3</sup> -Ca1-O11 <sup>1</sup> | 141.03(8)       | O13 <sup>7</sup> -Ca2-O20             | 84.41(8)        |
| O7 <sup>3</sup> -Ca1-O8 <sup>3</sup>  | 71.94(8)        | O13 <sup>7</sup> -Ca2-O9 <sup>6</sup> | 98.97(9)        |

|                                      |           |                                       |            |
|--------------------------------------|-----------|---------------------------------------|------------|
| O7 <sup>3</sup> -Ca1-O13             | 92.43(8)  | O15-Ca3-O16                           | 78.39(14)  |
| O7 <sup>3</sup> -Ca1-O3 <sup>4</sup> | 81.81(8)  | O15-Ca3-O17                           | 148.49(14) |
| O7 <sup>3</sup> -Ca1-O15             | 138.30(8) | O13 <sup>7</sup> -Ca2-O2 <sup>2</sup> | 85.3(2)    |
| O20-Ca2-O8 <sup>6</sup>              | 75.93(8)  | O14-Ca3-O11 <sup>1</sup>              | 72.17(7)   |
| O13 <sup>7</sup> -Ca2-O20            | 84.41(8)  | O22-Ca2-O9 <sup>6</sup>               | 76.76(18)  |

<sup>1</sup>+X,1/2-Y,-1/2+Z; <sup>2</sup>1-X,-1/2+Y,1/2-Z; <sup>3</sup>2-X,-1/2+Y,1/2-Z; <sup>4</sup>1+X,+Y,+Z; <sup>5</sup>1+X,1/2-Y,-1/2+Z; <sup>6</sup>-1+X,+Y,+Z; <sup>7</sup>1-X,1/2+Y,1/2-Z; <sup>8</sup>+X,1/2-Y,1/2+Z; <sup>9</sup>2-X,1/2+Y,1/2-Z; <sup>10</sup>-1+X,1/2-Y,1/2+Z

Table S3 Crystallographic data of **MOF 2**

| parameter                                    | {[Cd <sub>3</sub> (ddpa)·6H <sub>2</sub> O]·4H <sub>2</sub> O} <sub>n</sub> |
|----------------------------------------------|-----------------------------------------------------------------------------|
| Formula                                      | C <sub>24</sub> H <sub>28</sub> Cd <sub>3</sub> O <sub>25</sub>             |
| Formula weight                               | 1053.66 g/mol                                                               |
| Crystal system                               | <i>Monoclinic</i>                                                           |
| Space group                                  | C2/c                                                                        |
| <i>a</i> / Å                                 | 18.184(2)                                                                   |
| <i>b</i> / Å                                 | 13.6565(13)                                                                 |
| <i>c</i> / Å                                 | 14.5002(15)                                                                 |
| $\alpha$ / °                                 | 90                                                                          |
| $\beta$ / °                                  | 113.959(3)                                                                  |
| $\gamma$ / °                                 | 90                                                                          |
| V (Å <sup>3</sup> )                          | 3290.6(6)                                                                   |
| Z                                            | 4                                                                           |
| $\rho_{\text{calc}}/\text{cm}^3$             | 2.127                                                                       |
| The Range for data Collection                | 5.52 to 50.064                                                              |
| Data / restraints / parameters               | 2888/0/238                                                                  |
| Independent reflections                      | 2888 [ $R_{\text{int}}=0.0690, R_{\text{sigma}}=0.0571$ ]                   |
| Completeness / %                             | 99.9%                                                                       |
| GOF on $F^2$                                 | 1.084                                                                       |
| Final R indices ( $I > 2\sigma(I)$ )         | $R_1=0.0388, wR_2=0.0902$                                                   |
| R indices (all data)                         | $R_1=0.0608, wR_2=0.1009$                                                   |
| Largest diff. peak / hole / eÅ <sup>-3</sup> | 1.05/-0.60                                                                  |

$${}^a R_1 = \frac{\sum ||F_0| - |F_c||}{\sum |F_0|}, {}^b wR_2 = \left[ \frac{\sum w(F_0^2 - F_c^2)^2}{\sum w(F_0^2)^2} \right]^{1/2}$$

Table S4 Selected bond lengths (Å) and angles (°) for the **MOF 2**

| Bond                | Length/Å | Bond                | Length/Å |
|---------------------|----------|---------------------|----------|
| Cd1-O3 <sup>3</sup> | 2.281(4) | Cd2-O1 <sup>6</sup> | 2.328(4) |

|                                      |                 |                                       |                 |
|--------------------------------------|-----------------|---------------------------------------|-----------------|
| Cd1-O3                               | 2.281(4)        | Cd2-O2 <sup>6</sup>                   | 2.409(4)        |
| Cd1-O7 <sup>4</sup>                  | 2.321(4)        | Cd2-O4 <sup>7</sup>                   | 2.225(4)        |
| Cd1-O7 <sup>5</sup>                  | 2.321(4)        | Cd2-O6                                | 2.208(4)        |
| Cd1-O10 <sup>3</sup>                 | 2.232(5)        | Cd2-O8                                | 2.323(5)        |
| Cd1-O10                              | 2.232(5)        | Cd2-O9                                | 2.419(4)        |
| Angle                                | $\omega/^\circ$ | Angle                                 | $\omega/^\circ$ |
| O4 <sup>7</sup> -Cd2-O8              | 90.86(18)       | O10 <sup>3</sup> -Cd1-O3              | 88.93(16)       |
| O4 <sup>7</sup> -Cd2-O9              | 82.38(15)       | O10 <sup>3</sup> -Cd1-O3 <sup>3</sup> | 91.07(16)       |
| O4 <sup>7</sup> -Cd2-O2 <sup>6</sup> | 146.71(15)      | O10-Cd1-O3 <sup>3</sup>               | 88.93(16)       |
| O6-Cd2-O1 <sup>6</sup>               | 141.74(15)      | O10-Cd1-O3                            | 91.07(16)       |
| O6-Cd2-O2 <sup>6</sup>               | 92.34(16)       | O10 <sup>3</sup> -Cd1-O7 <sup>4</sup> | 88.20(16)       |
| O6-Cd2-O4 <sup>7</sup>               | 116.92(16)      | O10 <sup>3</sup> -Cd1-O7 <sup>5</sup> | 91.80(17)       |
| O6-Cd2-O8                            | 117.00(17)      | O10-Cd1-O7 <sup>4</sup>               | 91.79(16)       |
| O6-Cd2-O9                            | 81.98(15)       | O10-Cd1-O7 <sup>5</sup>               | 88.21(16)       |
| O4 <sup>7</sup> -Cd2-O1 <sup>6</sup> | 91.83(15)       | O10 <sup>3</sup> -Cd1-O10             | 180             |
| O8-Cd2-O1 <sup>6</sup>               | 85.05(16)       | O7 <sup>5</sup> -Cd1-O7 <sup>4</sup>  | 180             |
| O8-Cd2-O2 <sup>6</sup>               | 89.24(18)       | O1 <sup>6</sup> -Cd2-O2 <sup>6</sup>  | 55.02(14)       |
| O8-Cd2-O9                            | 160.76(16)      | O1 <sup>6</sup> -Cd2-O9               | 77.22(15)       |
| O3 <sup>3</sup> -Cd1-O3              | 180.00(12)      | O3-Cd1-O7 <sup>5</sup>                | 90.09(14)       |
| O3 <sup>3</sup> -Cd1-O7 <sup>4</sup> | 90.08(14)       | O2 <sup>6</sup> -Cd2-O9               | 86.71(16)       |
| O3-Cd1-O7 <sup>4</sup>               | 89.91(14)       | O3 <sup>3</sup> -Cd1-O7 <sup>5</sup>  | 89.92(14)       |

<sup>1</sup>1/2+X,1/2-Y,1/2+Z; <sup>2</sup>1-X,+Y,1/2-Z; <sup>3</sup>1-X,2-Y,1-Z; <sup>4</sup>1-X,1-Y,1-Z; <sup>5</sup>+X,1+Y,+Z; <sup>6</sup>-1/2+X,1/2-Y,-1/2+Z;  
<sup>7</sup>+X,-1+Y,+Z

Table S5 Crystallographic data of **MOF 3**

| parameter                        | {[Zn <sub>3</sub> (ddpa)·2H <sub>2</sub> O]} <sub>n</sub>       |
|----------------------------------|-----------------------------------------------------------------|
| Formula                          | C <sub>24</sub> H <sub>13</sub> O <sub>17</sub> Zn <sub>3</sub> |
| Formula weight                   | 769.45 g/mol                                                    |
| Crystal system                   | <i>Monoclinic</i>                                               |
| Space group                      | P2 <sub>1</sub> /n                                              |
| <i>a</i> / Å                     | 10.2364(5)                                                      |
| <i>b</i> / Å                     | 13.3601(8)                                                      |
| <i>c</i> / Å                     | 29.3596(18)                                                     |
| $\alpha / ^\circ$                | 90                                                              |
| $\beta / ^\circ$                 | 93.623(2)                                                       |
| $\gamma / ^\circ$                | 90                                                              |
| V (Å <sup>3</sup> )              | 4007.2(4)                                                       |
| Z                                | 4                                                               |
| $\rho_{\text{calc}}/\text{cm}^3$ | 1.275                                                           |

|                                                |                                            |
|------------------------------------------------|--------------------------------------------|
| The Range for data Collection                  | 4.304 to 52.042                            |
| Data / restraints / parameters                 | 7900/19/385                                |
| Independent reflections                        | 7900[ $R_{int}=0.0551, R_{sigma}=0.0298$ ] |
| Completeness / %                               | 99.9%                                      |
| GOF on $F^2$                                   | 1.077                                      |
| Final R indices( $I > 2\sigma(I)$ )            | $R_1=0.0578, wR_2=0.1743$                  |
| R indices (all data)                           | $R_1=0.0706, wR_2=0.1877$                  |
| Largest diff. peak / hole / $e\text{\AA}^{-3}$ | 2.18/-1.14                                 |

$${}^a R_1 = \frac{\sum ||F_0| - |F_c||}{\sum |F_0|}, {}^b wR_2 = \left[ \frac{\sum w(F_0^2 - F_c^2)^2}{\sum w(F_0^2)^2} \right]^{1/2}$$

Table S6 Selected bond lengths (Å) and angles (°) for the **MOF 3**

| Bond                                   | Length/Å        | Bond                                   | Length/Å        |
|----------------------------------------|-----------------|----------------------------------------|-----------------|
| Zn1-O1 <sup>1</sup>                    | 1.983(3)        | Zn2-O11 <sup>5</sup>                   | 1.976(3)        |
| Zn1-O4                                 | 2.010(4)        | Zn2-O17                                | 1.945(3)        |
| Zn1-O6 <sup>2</sup>                    | 2.375(4)        | Zn3-O3 <sup>6</sup>                    | 2.105(5)        |
| Zn1-O13 <sup>3</sup>                   | 2.063(4)        | Zn3-O9 <sup>3</sup>                    | 2.107(5)        |
| Zn1-O17 <sup>2</sup>                   | 2.003(3)        | Zn3-O14                                | 2.038(6)        |
| Zn2-O7                                 | 1.946(3)        | Zn3-O15                                | 2.087(6)        |
| Zn2-O8 <sup>4</sup>                    | 1.964(3)        | Zn3-O16                                | 2.075(6)        |
| Zn3-O17 <sup>7</sup>                   | 2.080(3)        |                                        |                 |
| Angle                                  | $\omega/^\circ$ | Angle                                  | $\omega/^\circ$ |
| O1 <sup>1</sup> -Zn1-O4                | 104.18(16)      | O15-Zn3-O9 <sup>3</sup>                | 86.5(3)         |
| O1 <sup>1</sup> -Zn1-O6 <sup>2</sup>   | 84.68(15)       | O16-Zn3-O3 <sup>6</sup>                | 88.8(2)         |
| O1 <sup>1</sup> -Zn1-O13 <sup>3</sup>  | 97.53(15)       | O16-Zn3-O9 <sup>3</sup>                | 86.2(2)         |
| O1 <sup>1</sup> -Zn1-O17 <sup>2</sup>  | 134.90(15)      | O16-Zn3-O15                            | 89.9(2)         |
| O4-Zn1-O6 <sup>2</sup>                 | 86.45(15)       | O16-Zn3-O17 <sup>7</sup>               | 179.28(19)      |
| O4-Zn1-O13 <sup>3</sup>                | 96.09(16)       | O17 <sup>7</sup> -Zn3-O3 <sup>6</sup>  | 90.64(16)       |
| O13 <sup>3</sup> -Zn1-O6 <sup>2</sup>  | 176.10(15)      | O17 <sup>7</sup> -Zn3-O9 <sup>3</sup>  | 94.19(16)       |
| O17 <sup>2</sup> -Zn1-O4               | 118.83(14)      | O17 <sup>7</sup> -Zn3-O15              | 90.69(18)       |
| O17 <sup>2</sup> -Zn1-O6 <sup>2</sup>  | 85.04(14)       | O15-Zn3-O3 <sup>6</sup>                | 172.0(2)        |
| O17 <sup>2</sup> -Zn1-O13 <sup>3</sup> | 91.14(15)       | Zn1 <sup>2</sup> -O17-Zn3 <sup>9</sup> | 105.50(14)      |
| O7-Zn2-O8 <sup>4</sup>                 | 105.80(15)      | Zn2-O17-Zn1 <sup>2</sup>               | 119.08(16)      |
| O7-Zn2-O11 <sup>5</sup>                | 106.57(15)      | Zn2-O17-Zn3 <sup>9</sup>               | 114.66(15)      |
| O8 <sup>4</sup> -Zn2-O11 <sup>5</sup>  | 100.65(16)      | O14-Zn3-O3 <sup>6</sup>                | 95.0(2)         |
| O17-Zn2-O7                             | 119.66(14)      | O14-Zn3-O9 <sup>3</sup>                | 176.5(2)        |
| O17-Zn2-O8 <sup>4</sup>                | 115.09(14)      | O14-Zn3-O15                            | 92.9(2)         |
| O17-Zn2-O11 <sup>5</sup>               | 107.12(14)      | O14-Zn3-O16                            | 90.4(2)         |
| O3 <sup>6</sup> -Zn3-O9 <sup>3</sup>   | 85.5(2)         | O14-Zn3-O17 <sup>7</sup>               | 89.26(18)       |

<sup>1</sup>1+X,+Y,+Z; <sup>2</sup>2-X,1-Y,1-Z; <sup>3</sup>3/2-X,1/2+Y,3/2-Z; <sup>4</sup>2-X,-Y,1-Z; <sup>5</sup>1-X,-Y,1-Z; <sup>6</sup>3/2-X,-1/2+Y,3/2-Z; <sup>7</sup>-1/2+X,1/2-Y,1/2+Z

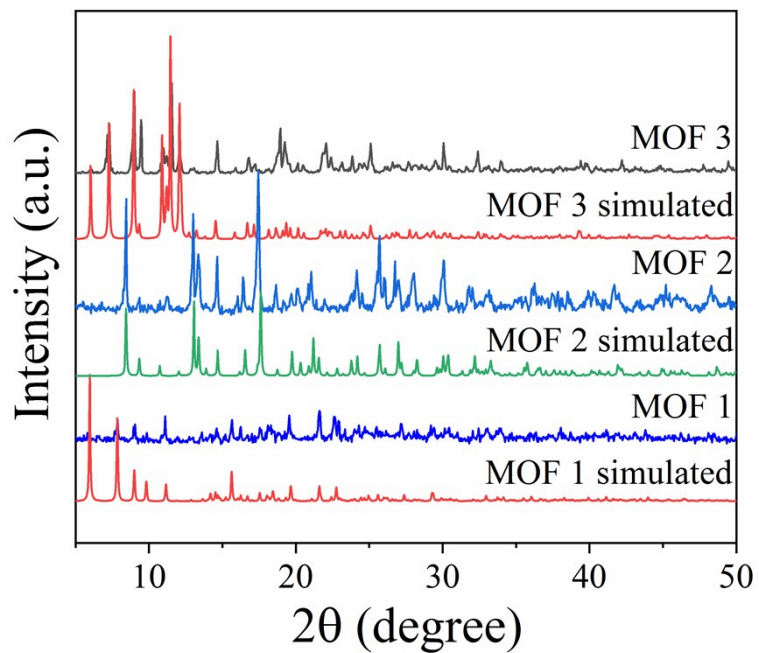

Figure S1 PXRD patterns of MOFs 1-3.

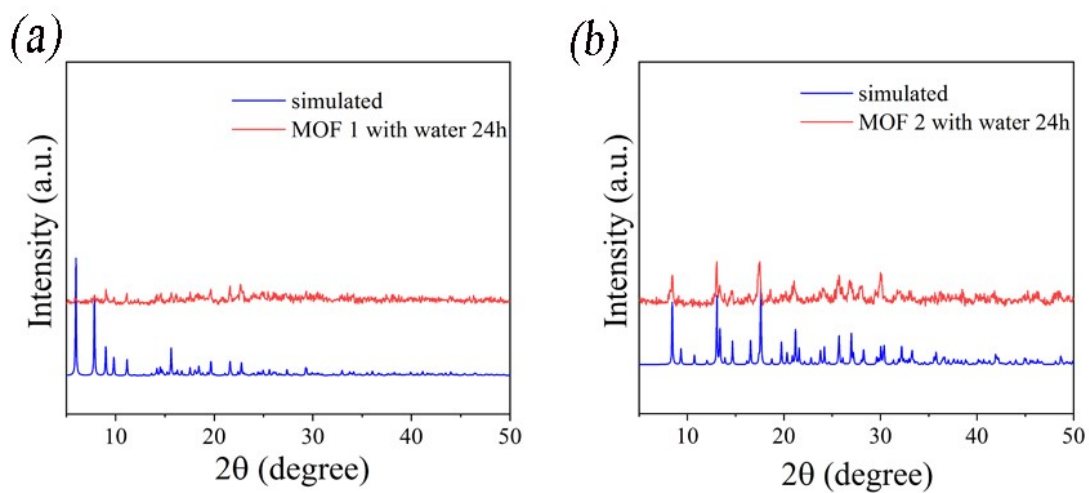

Figure S2 PXRD patterns of MOFs 1 and 2 after immersion in water for 24h.

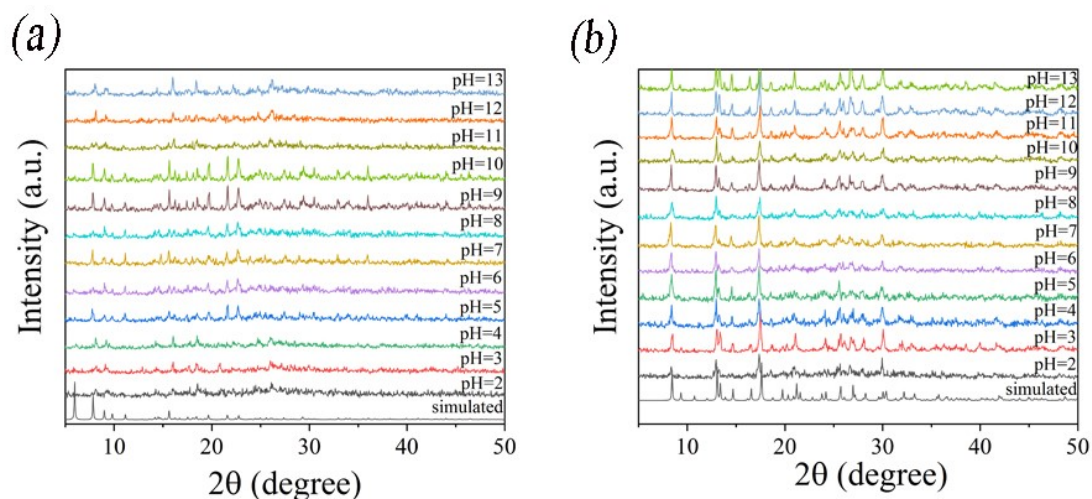

Figure S3 PXRD patterns of MOFs 1 and 2 after treated by aqueous solutions with various pH values from 2 to 13.

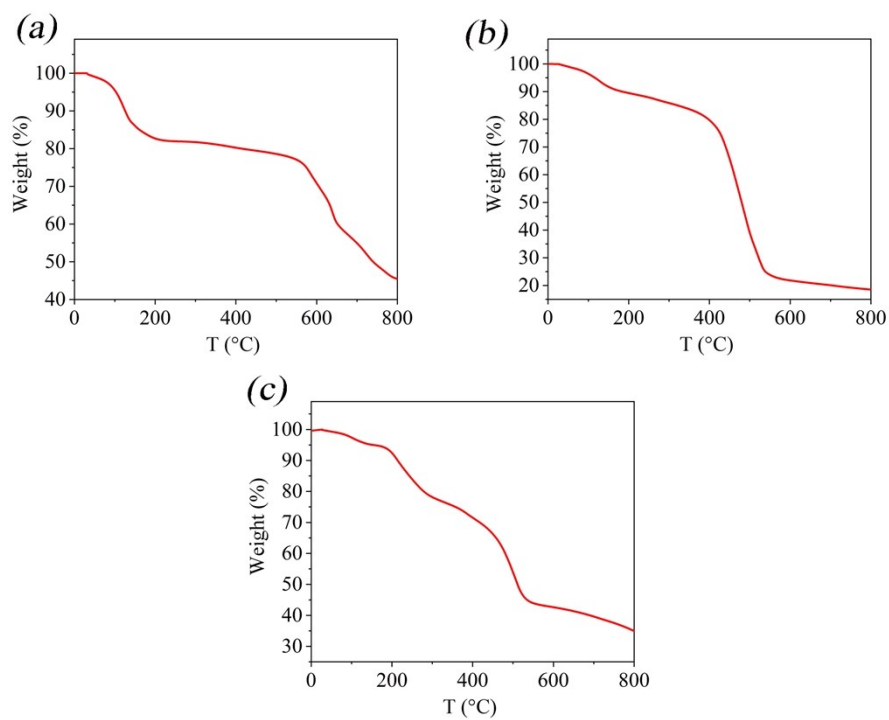

Figure S4 The TGA curves of MOFs 1-3.

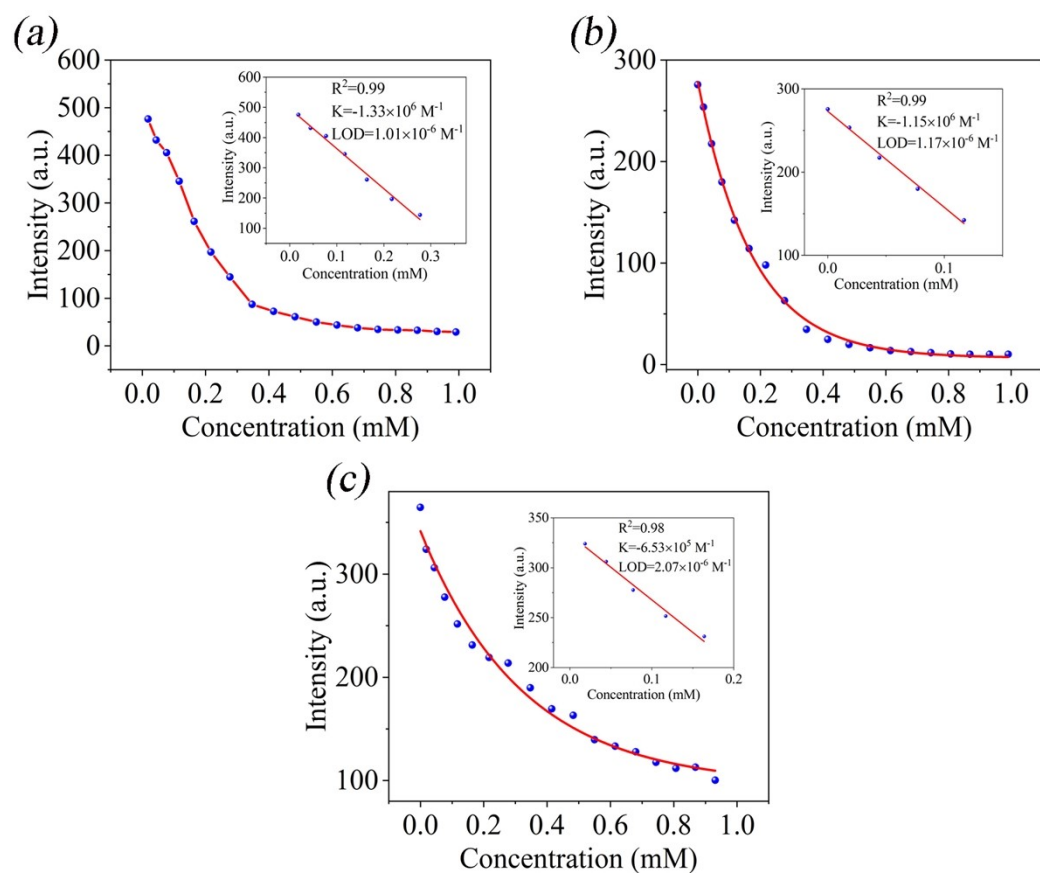

Figure S5 The plots of concentration vs. intensity and at low concentration with simulation equations of **MOFs 1-3**.



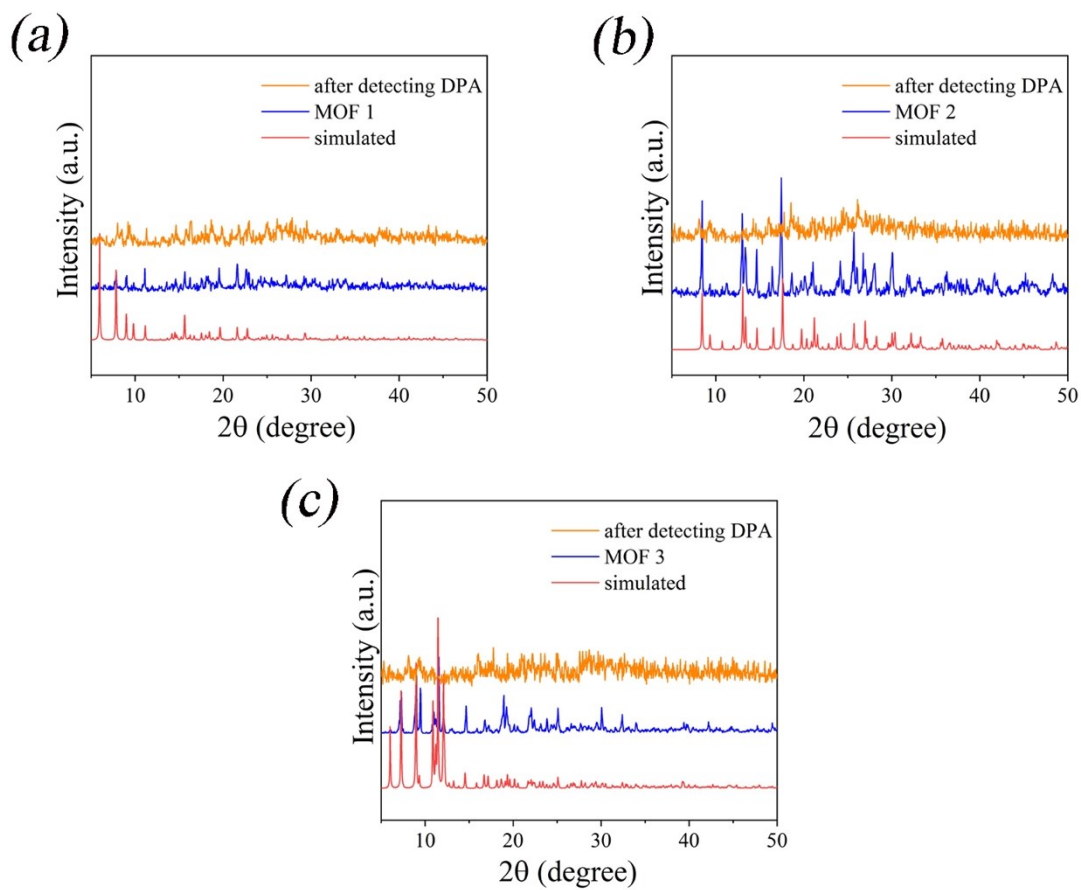

Figure S6 PXRD patterns of MOFs 1-3 after detecting DPA.

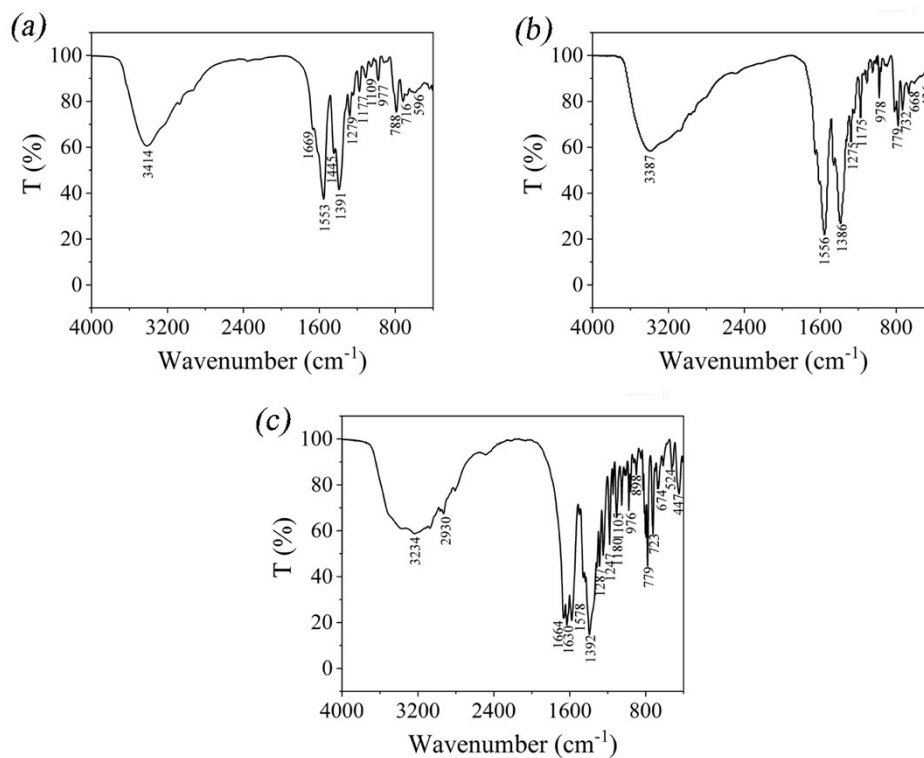

Figure S7 FT-IR spectra of MOFs 1-3.

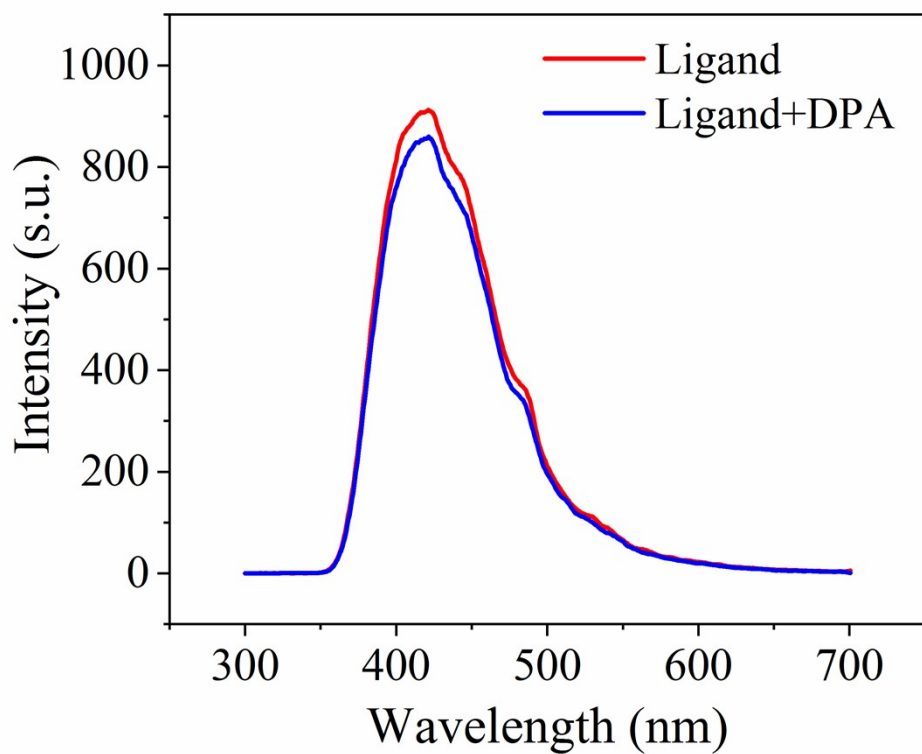

Figure S8 Fluorescence emission of ligand before and after PGA addition.

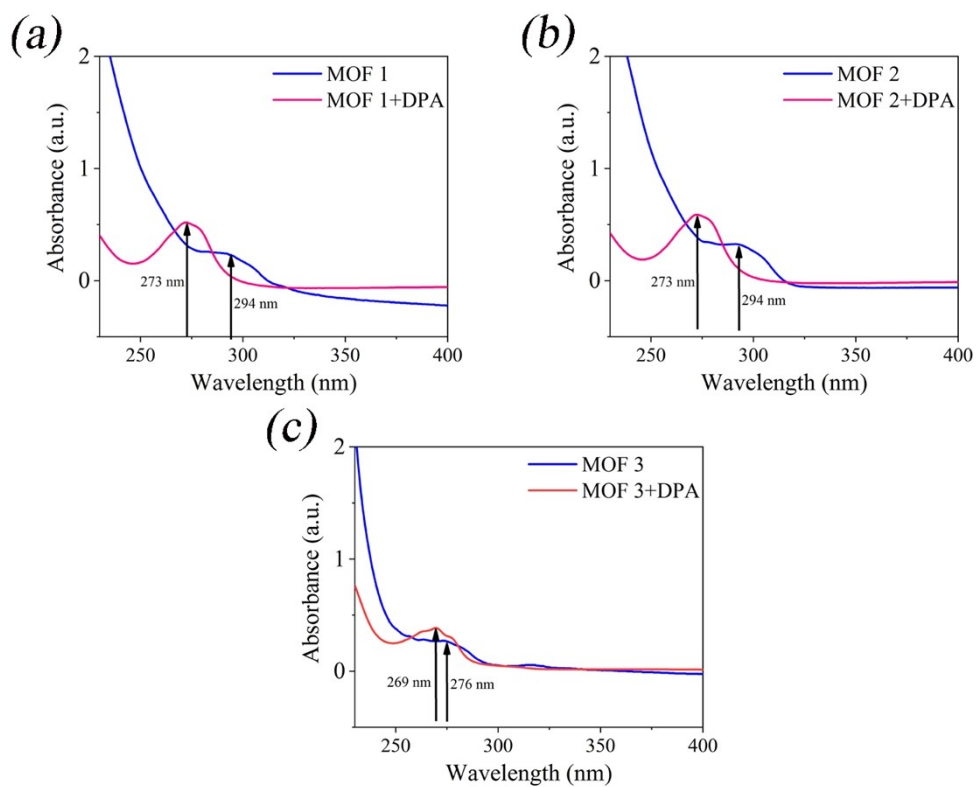

Figure S9 The comparison of UV spectra before and after addition of DPA.

**Table S7** A comparison of limit of detection (LOD) of various methods for sensing DPA.

| Methods                       | Sensor                                        | LOD ( $\mu\text{M}$ ) | Ref.      |
|-------------------------------|-----------------------------------------------|-----------------------|-----------|
| Fluorometric                  | <b>3</b>                                      | 0.248                 | S1        |
| Fluorometric                  | <b>6</b>                                      | 0.874                 | S1        |
| Fluorometric                  | <b>9</b>                                      | 2.277                 | S1        |
| Colorimetric,<br>fluorometric | EBT-Eu <sup>3+</sup>                          | 2                     | S2        |
| Fluorometric                  | LP-Eu <sup>3+</sup>                           | 0.3                   | S3        |
| Fluorometric                  | Pdots-Tb <sup>3+</sup>                        | 0.2                   | S4        |
| Colorimetric,<br>fluorometric | PV-Tb <sup>3+</sup>                           | 5                     | S5        |
| Fluorometric                  | GNPs-Tb <sup>3+</sup><br>and Eu <sup>3+</sup> | 1                     | S6        |
| Colorimetric,<br>fluorometric | BODIPY-Cu <sup>2+</sup>                       | 2                     | S7        |
| Colorimetric                  | UCNPs-<br>TPP/EBT                             | 0.9                   | S8        |
| fluorometric                  | <b>MOF 1</b>                                  | 1.01                  | This work |
| fluorometric                  | <b>MOF 2</b>                                  | 1.17                  | This work |
| fluorometric                  | <b>MOF 3</b>                                  | 2.07                  | This work |

**REFERENCE**

- S1 M.-L. Shen, B. Liu, L. Xu and H. Jiao, *Journal of Materials Chemistry C*, 2020, **8**, 4392-4400.
- S2 M. D. Yilmaz and H. A. Oktem, *Anal. Chem.*, 2018, **90**, 4221.
- S3 H. Seo, S. Singha and K. H. Ahn, *Asian J. Org. Chem.*, 2017, **6**, 1257.
- S4 Q. Li, K. Sun, K. W. Chang, J. B. Yu, D. T. Chiu, C. F. Wu and W. P. Qin, *Anal. Chem.*, 2013, **85**, 9087.
- S5 K. J. Clear, S. Stroud and B. D. Smith, *Analyst*, 2013, **138**, 7079.
- S6 M. Donmez, M. D. Yilmaz and B. Kilbas, *J. Hazard. Mater.*, 2017, **324**, 593.
- S7 Y. Cetinkaya, M. N. Z. Yurt, H. A. Oktem and M. D. Yilmaz, *J. Hazard. Mater.*, 2019, **377**, 299.
- S8 Z. H. Chen, X. Liu, S. Q. Zhang, T. Yang, M. L. Chen and J. H. Wang, *Anal. Chem.*, 2019, **91**, 12094.
